# Supplementary material for: SoyDB: a knowledge database of soybean transcription factors
Source: Springer Nature journal article supplement (doi:10.1186/1471-2229-10-14), 2010-01-18
Supplement: Additional file 4 [file 1471-2229-10-14-s4.pdf]

## Classify a query sequence into one of 64 transcription factor families

Please paste or type in the query amino acid sequence below:

```
IIIIAPSLQEGKLM L P N K F V E K Y G E G L P N T L F L K A P N G A E W K L T L E K R D D K M W F Q R G W R E F A K H H S L D H G H L L :  
V E G K M T S N Y Q K N K R P N G E K L E Y E F L Q P C M G S R K C V K V D N T M K P K L G C S A C A S Y R Q K G Q R Y T I L S Q L G H S F Y L :  
V I Y P S N A R S R G P L
```

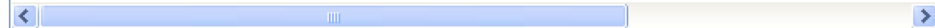

(This process may take about 10 seconds, depending on the length of query sequence. Please wait after clicking the "Predict" button.)
